# Supplementary material for: Glycosynthase-based synthesis of xylo-oligosaccharides using an engineered retaining xylanase from Cellulomonas fimi
Source: Royal Society of Chemistry journal article supplement (doi:10.1039/b601667g), 2006-01-01
Supplement: b601667g.pdf [file b601667g.pdf]

## SUPPORTING INFORMATION

### **Glycosynthase-based Synthesis of Xylo-oligosaccharides using an Engineered Retaining Xylanase from *Cellulomonas fimi***

Young-Wan Kim,<sup>a</sup> David T. Fox,<sup>a</sup> Omid Hekmat,<sup>a</sup> Terrence Kantner,<sup>a,b</sup> Lawrence P. McIntosh,<sup>b</sup>  
R. Antony J. Warren,<sup>c</sup> and Stephen G. Withers<sup>\*a,b</sup>

<sup>a</sup> *Department of Chemistry, University of British Columbia, Vancouver, British Columbia V6T 1Z1, Email; withers@chem.ubc.ca; Fax: +1-604-822-8869; Tel.: +1-604-822-3402*

<sup>b</sup> *Department of Biochemistry and Molecular Biology, University of British Columbia, Vancouver, British Columbia V6T 1Z3*

<sup>c</sup> *Department of Microbiology and Immunology, University of British Columbia, Vancouver, British Columbia V6T 1Z1*

### Construction strategy for CFXcd and its nucleophile mutants

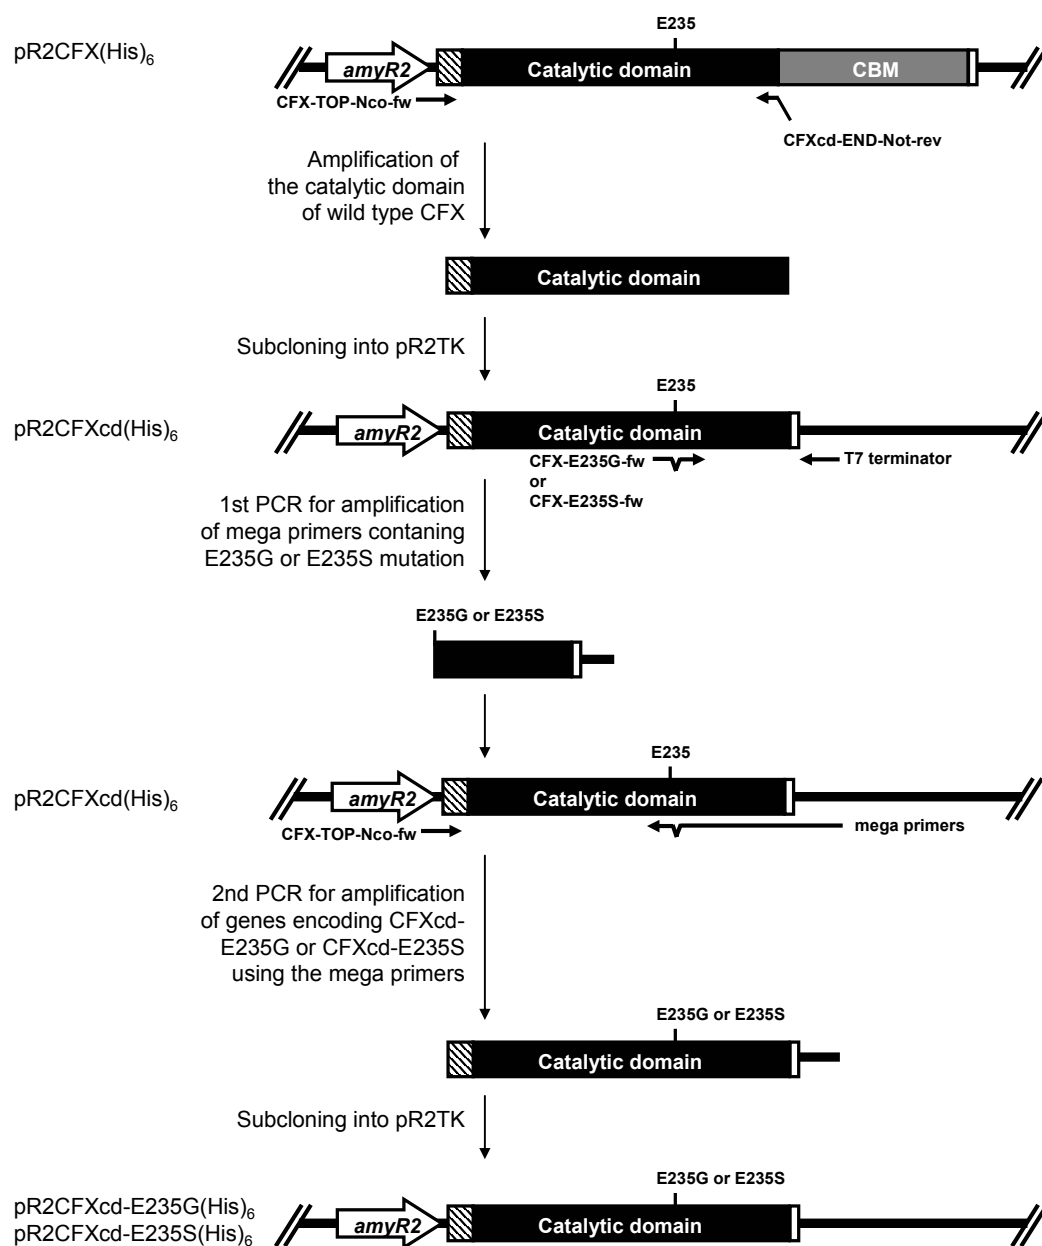

**Fig. S-1** Construction strategy for pR2CFXcd(His)<sub>6</sub>, pR2CFXcd-E235G(His)<sub>6</sub>, and pR2CFXcd-E235S(His)<sub>6</sub>

### Selection of active glycosynthases derived from CFXcd

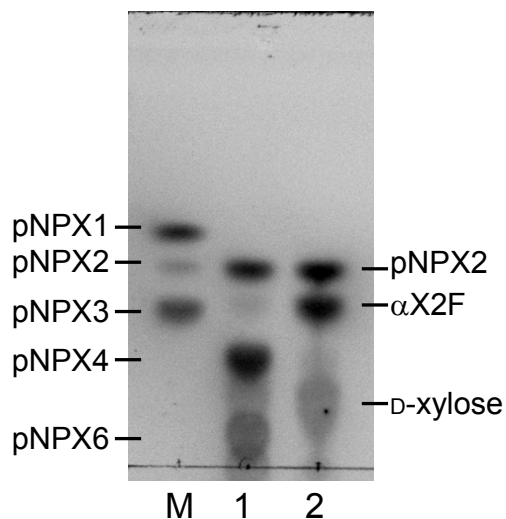

**Fig. S-2** TLC analysis of the reaction mixtures using CFXcd-E235G and CFXcd-E235S mutants.

Lane M, standards for pNP xylooligosaccharides, pNPX, pNPX2, and pNPX3; Lane 1, the reaction mixture of CFXcd-E235G; Lane 2, the reaction mixture of CFXcd-E235S.  $\alpha$ X2F and pNPX2 were used as donor and acceptor, respectively. The plate was visualized by exposure to 10 % sulfuric acid in methanol followed by charring.

### Enzyme stability

In order to investigate enzyme stability, aliquots of CFXcd-E235G (in 50 mM phosphate buffer/pH 7.0) were incubated at 37 °C for 24 h and 48 h without substrates. Then, glycosynthase reactions were carried out using the preincubated enzymes. A control reaction was carried out using CFXcd-E235G which stored at 4 °C. The concentrations of substrates were 10 mM. After 12 h incubation at 30 °C, the reaction mixtures were analyzed using TLC. The amount of transfer products in the reactions using the preincubated enzymes was not so much different (Fig. S-3). This result suggests that CFXcd-E235G is stable at 37 °C for 48 h, and its activity also maintained after the reaction for the synthesis of xylooligosaccharides (30 °C, 24 h)

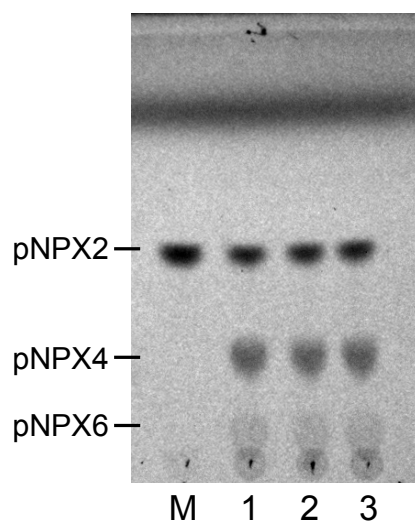

**Fig. S-3** TLC analysis of the reaction mixtures using CFXcd-E235G stored at 4 °C and 37 °C . Lane 1, blank reaction without enzyme; Lane 2, the reaction mixture of CFXcd-E235G stored at 4 °C; Lane 3, the reaction mixture of CFXcd-E235G stored at 37 °C for 24 h; Lane 4, the reaction mixture of CFXcd-E235G stored at 37 °C for 48 h.  $\alpha$ X2F and pNPX2 were used as donor and acceptor, respectively. The plate was visualized under UV light.

**Time dependence during the preparative scale synthesis**

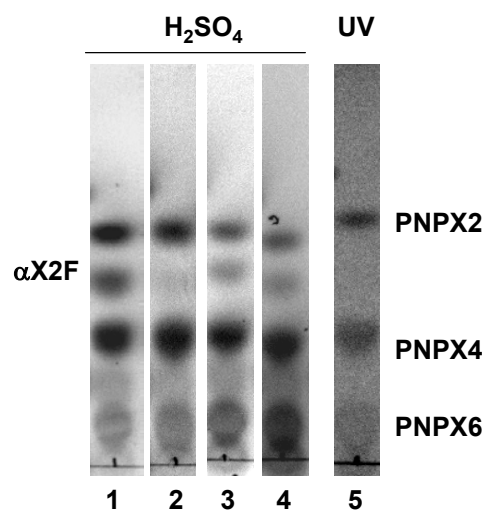

**Fig. S-4** TLC of the reactions of CFXcd-E235G using  $\alpha X2F$  and pNPX2 over time.

Lane 1, reaction mixture after 6 h; Lane 2, reaction mixture after 10 h; Lane 3, reaction mixture after 21 h; Lane 4, reaction mixture after 24 h; Lane 5, reaction mixture after 21 h. The plate for Lane 5 was visualized under UV light and the others by exposure to 10 % sulfuric acid in methanol followed by charring.

**Mass spectrometry data for purified aryl xylooligosaccharides**

**4-Nitrophenyl**  $\beta$ -D-xylopyranosyl-(1 $\rightarrow$ 4)-bis[ $\beta$ -D-xylopyranosyl-(1 $\rightarrow$ 4)]- $\beta$ -D-xylopyranoside (PNPX4). ESI MS: Calcd for C<sub>26</sub>H<sub>37</sub>NO<sub>19</sub>+Na<sup>+</sup>: 690.2. Found: 690.2

**4-Nitrophenyl**  $\beta$ -D-xylopyranosyl-(1 $\rightarrow$ 4)-tetra[ $\beta$ -D-xylopyranosyl-(1 $\rightarrow$ 4)]- $\beta$ -D-xylopyranoside (PNPX6). ESI MS: Calcd for C<sub>36</sub>H<sub>53</sub>NO<sub>27</sub>+Na<sup>+</sup>: 954.3. Found: 954.4

**4-Nitrophenyl**  $\beta$ -D-xylopyranosyl-(1 $\rightarrow$ 4)-hexa[ $\beta$ -D-xylopyranosyl-(1 $\rightarrow$ 4)]- $\beta$ -D-xylopyranoside (PNPX8). ESI MS: Calcd for C<sub>46</sub>H<sub>69</sub>NO<sub>35</sub>+Na<sup>+</sup>: 1218.5 + 23. Found: 1218.5

**4-Nitrophenyl**  $\beta$ -D-xylopyranosyl-(1 $\rightarrow$ 4)-octa[ $\beta$ -D-xylopyranosyl-(1 $\rightarrow$ 4)]- $\beta$ -D-xylopyranoside (PNPX10). ESIMS: Calcd for C<sub>56</sub>H<sub>85</sub>NO<sub>43</sub>+Na<sup>+</sup>: 1482.4. Found: 1482.8

**4-Nitrophenyl**  $\beta$ -D-xylopyranosyl-(1 $\rightarrow$ 4)-deca[ $\beta$ -D-xylopyranosyl-(1 $\rightarrow$ 4)]- $\beta$ -D-xylopyranoside (PNPX12). ESI MS: Calcd for C<sub>66</sub>H<sub>101</sub>NO<sub>51</sub>+Na<sup>+</sup>: 1746.5. Found: 1747.1

**Benzylthio**  $\beta$ -D-xylopyranosyl-(1 $\rightarrow$ 4)-bis[ $\beta$ -D-xylopyranosyl-(1 $\rightarrow$ 4)]- $\beta$ -D-xylopyranoside (BTX4). ESI MS: Calcd for C<sub>27</sub>H<sub>40</sub>O<sub>16</sub>S+Na<sup>+</sup>: 675.2. Found: 675.2

**Benzylthio**  $\beta$ -D-xylopyranosyl-(1 $\rightarrow$ 4)-tetra[ $\beta$ -D-xylopyranosyl-(1 $\rightarrow$ 4)]- $\beta$ -D-xylopyranoside (BTX6). ESI MS: Calcd for C<sub>37</sub>H<sub>56</sub>O<sub>24</sub>S+Na<sup>+</sup>: 939.3. Found: 939.5

**Benzylthio**  $\beta$ -D-xylopyranosyl-(1 $\rightarrow$ 4)-hexa[ $\beta$ -D-xylopyranosyl-(1 $\rightarrow$ 4)]- $\beta$ -D-xylopyranoside (BTX8). ESI MS: Calcd for C<sub>47</sub>H<sub>72</sub>O<sub>32</sub>S+Na<sup>+</sup>: 1203.4. Found: 1203.4

**Benzylthio**  $\beta$ -D-xylopyranosyl-(1 $\rightarrow$ 4)-octa[ $\beta$ -D-xylopyranosyl-(1 $\rightarrow$ 4)]- $\beta$ -D-xylopyranoside (BTX10). ESI MS: Calcd for C<sub>57</sub>H<sub>88</sub>O<sub>40</sub>S+Na<sup>+</sup>: 1467.4. Found: 1467.6

**Benzylthio**  $\beta$ -D-xylopyranosyl-(1 $\rightarrow$ 4)-deca[ $\beta$ -D-xylopyranosyl-(1 $\rightarrow$ 4)]- $\beta$ -D-xylopyranoside (BTX12). ESI MS: Calcd for C<sub>67</sub>H<sub>104</sub>O<sub>48</sub>S+Na<sup>+</sup>: 1731.5. Found: 1731.9
